# Supplementary material for: The Sde phosphoribosyl–linked ubiquitin transferases protect the Legionella pneumophila vacuole from degradation by the host
Source: PubMed Central journal article supplement — Proc Natl Acad Sci U S A. 2023 Aug 7;120(33):e2303942120. doi: 10.1073/pnas.2303942120 (PMC10437418; doi:10.1073/pnas.2303942120), 2023-08-07
Supplement: pnas.2303942120.sapp.pdf [file pnas.2303942120.sapp.pdf]

## Supporting Information

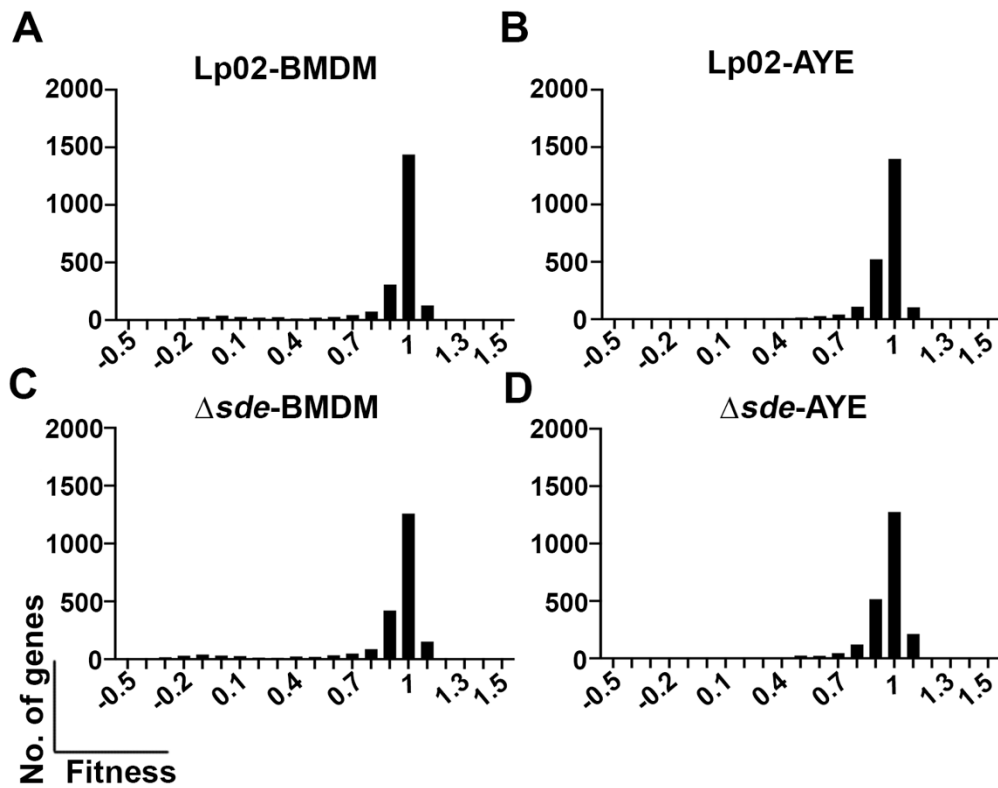

**Fig. S1 (Linked to Fig.1). Histogram plots of fitness for all *L. pneumophila* genes represented on Tn-seq.**

Histogram of WT (SK01) Tn-seq pool following either infection in BMDM (A) or growth in nutrient-rich AYE medium (B). Histogram of  $\Delta sde$  (SK02) Tn-seq pool following infection in BMDM (C) or growth in nutrient-rich AYE medium (D).

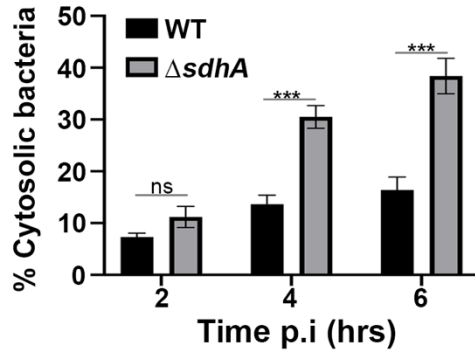

**Fig. S2 (Linked to Fig.3). The integrity of LCVs harboring  $\Delta sdhA$  strains after challenge with *L. pneumophila*.**

Percent cytosolic bacteria was quantified based on antibody accessibility. BMDMs were infected with either WT or  $\Delta sdhA$  strains for 2, 4, and 6 hr, fixed, and stained with antibodies. The internalized bacteria in the absence of permeabilization were calculated relative to the total infected population (mean  $\pm$  SEM; three biological replicates were performed and 100 LCVs were counted per biological replicate). Statistical analysis was conducted using unpaired two-tailed Student's t test (ns, not significant; \*\*\* $p < 0.001$ ).

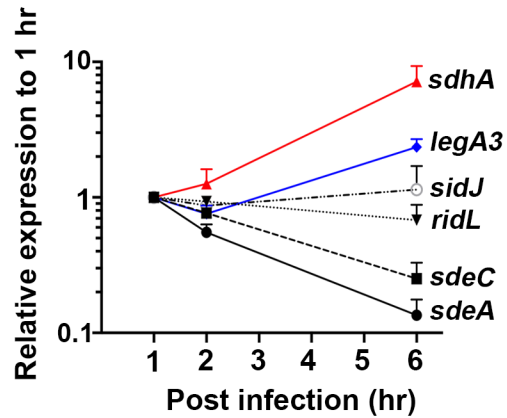

**Fig. S3 (Linked to Fig. 3). Transcription of *sde* genes is downregulated during *L. pneumophila* infection of BMDMs.**

Transcript abundance of indicated genes was determined during infection. PMA-differentiated U937 cells were challenged with *L. pneumophila* WT and RNA was extracted at the noted time points. Transcripts were normalized to 16s rRNA, and then displayed relative to transcription level measured at 1hr post-infection and represented as fold change.

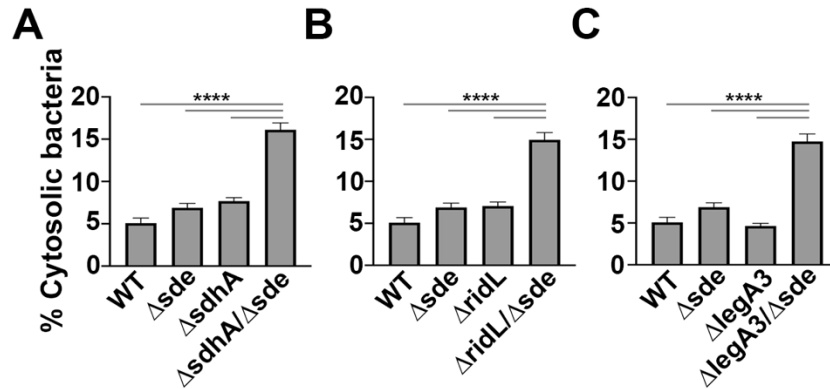

**Fig. S4 (Linked to Fig. 3). The loss of *sdhA*, *ridL* and *legA3* aggravated vacuole disruption in  $\Delta sde$  strain.**

Vacuole integrity was measured based on antibody accessibility. BMDMs in a 96 well plate were infected with the indicated strains for 2 hr, fixed and stained with antibodies. The images were taken using a Lionheart automated microscope with a 10X magnification objective. The internalized bacteria in the absence of permeabilization were calculated relative to total infected population to determine fraction of disrupted vacuoles (mean  $\pm$  SEM; three biological replicates were performed and 1000-3000 LCVs were counted per biological replicate). Statistical significance was tested using one-way ANOVA with Tukey's multiple comparisons; \*\*\*p < 0.001.

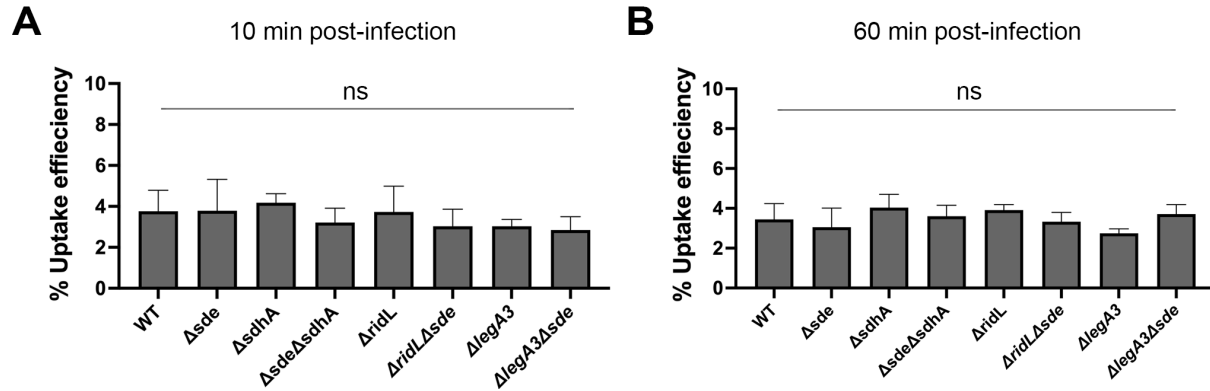

**Fig. S5 (Linked to Fig. 3). Uptake efficiency of *L. pneumophila* is independent of genetic background.**

BMDMs were challenged with noted strains, washed 3X with PBS at 10 or 60 min post-infection, lysed and cell lysates were plated on CYE plates. The efficiency of association was determined with CFUs in the inoculum and after either 10 or 60 min. incubation with BMDMs (mean  $\pm$  SEM; two biological replicates were performed with three technical replicates per biological replicate). Statistical significance was determined using one-way ANOVA with Tukey's multiple comparisons; ns, non-significant.



**Table S1. Strains, Plasmids and Oligonucleotides used in this study**

| <b>Strains</b>        |                                                                                                                                                          |                                                           |           |
|-----------------------|----------------------------------------------------------------------------------------------------------------------------------------------------------|-----------------------------------------------------------|-----------|
| Name                  | Genotype                                                                                                                                                 | Description                                               | Reference |
| <i>L.pneumophila</i>  |                                                                                                                                                          |                                                           |           |
| Lp02                  | Philadelphia 1 <i>thyA</i> <sup>-</sup> <i>rpsL hsdR</i>                                                                                                 | Wild type strain                                          | (1)       |
| SK01                  | Lp02 <i>thyA</i> <sup>+</sup>                                                                                                                            | Wild type strain <i>thyA</i> <sup>+</sup>                 | This work |
| Lp03                  | <i>thyA</i> <sup>+</sup> <i>rpsL hsdR dotA03</i>                                                                                                         | Icm/Dot translocation deficient                           | (1)       |
| JV6113                | Lp02 $\Delta$ <i>sidE</i> $\Delta$ <i>sdeC</i> $\Delta$ <i>sdeBA</i><br>( $\Delta$ <i>lpg0234</i> $\Delta$ <i>lpg2153</i> $\Delta$ <i>lpg2156-2157</i> ) | <i>sidE</i> family deletion mutant                        | (2)       |
| SK02                  | JV6113 <i>thyA</i> <sup>+</sup>                                                                                                                          | JV6113 strain <i>thyA</i> <sup>+</sup>                    | This work |
| SK03                  | Lp02 <i>thyA</i> <sup>+</sup> $\Delta$ <i>sdhA</i>                                                                                                       | <i>sdhA</i> deletion mutant                               | This work |
| SK04                  | JV6113 <i>thyA</i> <sup>+</sup> $\Delta$ <i>sdhA</i>                                                                                                     | <i>sdhAsidE</i> family deletion mutant                    | This work |
| SK05                  | Lp02 <i>thyA</i> <sup>+</sup> $\Delta$ <i>ridL</i>                                                                                                       | <i>ridL</i> deletion mutant                               | This work |
| SK06                  | JV6113 <i>thyA</i> <sup>+</sup> $\Delta$ <i>ridL</i>                                                                                                     | <i>ridLsidE</i> family deletion mutant                    | This work |
| SK07                  | Lp02 <i>thyA</i> <sup>+</sup> $\Delta$ <i>legA3</i>                                                                                                      | <i>legA3</i> deletion mutant                              | This work |
| SK08                  | JV6113 <i>thyA</i> <sup>+</sup> $\Delta$ <i>legA3</i>                                                                                                    | <i>legA3sidE</i> family deletion mutant                   | This work |
| SK09                  | Lp02 <i>thyA</i> <sup>+</sup> $\Delta$ <i>sdhA</i> $\Delta$ <i>ridL</i>                                                                                  | <i>sdhAridL</i> deletion mutant                           | This work |
| SK10                  | Lp02 <i>thyA</i> <sup>+</sup> $\Delta$ <i>sdhA</i> $\Delta$ <i>legA3</i>                                                                                 | <i>sdhA legA3</i> deletion mutant                         | This work |
| SK11                  | Lp02 <i>thyA</i> <sup>+</sup> $\Delta$ <i>ridL</i> $\Delta$ <i>legA3</i>                                                                                 | <i>ridL legA3</i> deletion mutant                         | This work |
| SK12                  | Lp02 <i>thyA</i> <sup>+</sup> <i>kan</i> <sup>R</sup> <i>P</i> <sub>ahpc</sub> :: <i>lux</i>                                                             | wild type strain Lux <sup>+</sup>                         | This work |
| SK13                  | JV6113 <i>thyA</i> <sup>+</sup> <i>kan</i> <sup>R</sup> <i>P</i> <sub>ahpc</sub> :: <i>lux</i>                                                           | <i>sidE</i> family deletion mutant Lux <sup>+</sup>       | This work |
| SK14                  | SK02 <i>kan</i> <sup>R</sup> <i>P</i> <sub>ahpc</sub> :: <i>lux</i>                                                                                      | <i>sdhA</i> deletion mutant Lux <sup>+</sup>              | This work |
| SK15                  | SK03 <i>kan</i> <sup>R</sup> <i>P</i> <sub>ahpc</sub> :: <i>lux</i>                                                                                      | <i>sdhAsidE</i> family deletion mutant Lux <sup>+</sup>   | This work |
| SK16                  | SK04 <i>kan</i> <sup>R</sup> <i>P</i> <sub>ahpc</sub> :: <i>lux</i>                                                                                      | <i>ridL</i> deletion mutant Lux <sup>+</sup>              | This work |
| SK17                  | SK05 <i>kan</i> <sup>R</sup> <i>P</i> <sub>ahpc</sub> :: <i>lux</i>                                                                                      | <i>ridLsidE</i> family deletion mutant                    | This work |
| SK18                  | SK06 <i>kan</i> <sup>R</sup> <i>P</i> <sub>ahpc</sub> :: <i>lux</i>                                                                                      | <i>legA3</i> deletion mutant Lux <sup>+</sup>             | This work |
| SK19                  | SK07 <i>kan</i> <sup>R</sup> <i>P</i> <sub>ahpc</sub> :: <i>lux</i>                                                                                      | <i>legA3 sidE</i> family deletion mutant Lux <sup>+</sup> | This work |
| Lp03 lux <sup>+</sup> | Lp03 <i>kan</i> <sup>R</sup> <i>P</i> <sub>ahpc</sub> :: <i>lux</i>                                                                                      | Icm/Dot translocation deficient Lux <sup>+</sup>          | (3)       |
| JV4487                | $\Delta$ <i>sidJ</i>                                                                                                                                     | <i>sidJ</i> deletion mutant                               | (2)       |
| SK20                  | Lp02 $\Delta$ <i>sdhA</i>                                                                                                                                | <i>sdhA</i> deletion mutant                               | This work |
| SK21                  | Lp02 $\Delta$ <i>sdhA</i> $\Delta$ <i>sidJ</i>                                                                                                           | <i>sdhAsidJ</i> deletion mutant                           | This work |
| SK22                  | SK01+ pMMB207 $\Delta$ 267                                                                                                                               |                                                           | This work |
| SK23                  | SK02+ pMMB207 $\Delta$ 267                                                                                                                               |                                                           | This work |
| SK24                  | SK03+ pMMB207 $\Delta$ 267                                                                                                                               |                                                           | This work |
| SK25                  | SK04+ pMMB207 $\Delta$ 267                                                                                                                               |                                                           | This work |



|      |                              |           |
|------|------------------------------|-----------|
| SK26 | SK04+ pSK04                  | This work |
| SK27 | SK04+ pSK05                  | This work |
| SK28 | SK04+ pSK06                  | This work |
| SK29 | SK04+ pSK07                  | This work |
| SK30 | JV6113 $\Delta$ <i>sdhA</i>  | This work |
| SK31 | SK29+ pSdeB <sub>WT</sub>    | This work |
| SK32 | SK29+ pSdeB <sub>C118S</sub> | This work |
| SK33 | SK29+ pSdeB <sub>H416A</sub> | This work |
| SK34 | SK29+ pSdeB <sub>E859A</sub> | This work |

## Plasmids

| Name                                 | Features                                                                                                                     | Description                                          | Reference            |
|--------------------------------------|------------------------------------------------------------------------------------------------------------------------------|------------------------------------------------------|----------------------|
| pTO100MmeI                           | R6Kori <i>kan<sup>R</sup></i> , <i>sacB</i> , <i>amp<sup>R</sup></i> , <i>himarI</i> -MmeI, C9 transposase                   | Tn-seq transposon mutagenesis plasmid                | (4)                  |
| pSR47S                               | R6Kori <i>sacB</i> , <i>kan<sup>R</sup></i>                                                                                  | suicide vector                                       | (5)                  |
| pSR47S- <i>P<sub>ahpc</sub>::lux</i> | R6Kori <i>sacB</i> , <i>kan<sup>R</sup></i> <i>P<sub>ahpc</sub>::lux</i>                                                     | pSR47 containing <i>P. luminescens</i> lux operon    | (6)                  |
| pJB3395                              | pBluescript:: <i>thyA<sup>+</sup> amp<sup>R</sup></i>                                                                        | <i>thyA</i> allelic exchange vector                  | J. Vogel             |
| pTO243                               | pbluescript:: PolyHis- <i>attR1</i> -[ <i>Kan<sup>R</sup></i> - <i>Kan<sup>R</sup></i> - <i>ccdB</i> ]- <i>attR2</i>         |                                                      | O'Connor<br>Tamara   |
| pSK01                                | pSR47S:: <i>ΔsdhA</i>                                                                                                        | <i>sdhA</i> deletion plasmid                         |                      |
| pSK02                                | pSR47S:: <i>ΔridL</i>                                                                                                        | <i>ridL</i> deletion plasmid                         |                      |
| pMMB207                              | <i>OriR</i> (RSF1010), Cm <sup>R</sup>                                                                                       |                                                      | (7)                  |
| pMMB207 $\Delta$ 267                 | <i>OriR</i> (RSF1010), Cm <sup>R</sup> , $\Delta$ 267                                                                        | pMMB207 lacking 267 bps of N- terminal <i>moba</i>   | Elizabeth<br>Creasey |
| pSK03                                | pMMB207 $\Delta$ 267::PolyHis- <i>attR1</i> -[ <i>Kan<sup>R</sup></i> - <i>Kan<sup>R</sup></i> - <i>ccdB</i> ]- <i>attR2</i> | Gateway destination version of pMMB207 $\Delta$ 267  | This work            |
| pSK04                                | pMMB207 $\Delta$ 267::PolyHis- <i>attB1</i> - <i>sdeA</i> - <i>attB2</i>                                                     | <i>sdeA</i> complementation plasmid                  | This work            |
| pSK05                                | pMMB207 $\Delta$ 267::PolyHis- <i>attB1</i> - <i>sdeB</i> - <i>attB2</i>                                                     | <i>sdeB</i> complementation plasmid                  | This work            |
| pSK06                                | pMMB207 $\Delta$ 267::PolyHis- <i>attB1</i> - <i>sdeC</i> - <i>attB2</i>                                                     | <i>sdeC</i> complementation plasmid                  | This work            |
| pSK07                                | pMMB207 $\Delta$ 267::PolyHis- <i>attB1</i> - <i>sdhA</i> - <i>attB2</i>                                                     | <i>sdhA</i> complementation plasmid                  | This work            |
| pSdeB <sub>WT</sub>                  | pJB908 PolyHis/c-myc- <i>attB1</i> - <i>sdeB<sub>WT</sub></i> - <i>attB2</i>                                                 | <i>sdeB</i> complementation plasmid                  | (8)                  |
| pSdeB <sub>C118S</sub>               | pJB908 PolyHis/c-myc- <i>attB1</i> - <i>sdeB<sub>C118S</sub></i> - <i>attB2</i>                                              | pJB908 expressing inactive DUB domain of <i>sdeB</i> | Kristin<br>Kotewicz  |
| pSdeB <sub>H416A</sub>               | pJB908 PolyHis/c-myc- <i>attB1</i> - <i>sdeB<sub>H416A</sub></i> - <i>attB2</i>                                              | pJB908 expressing inactive NP domain of <i>sdeB</i>  | Kristin<br>Kotewicz  |
| pSdeB <sub>E859A</sub>               | pJB908 PolyHis/c-myc- <i>attB1</i> - <i>sdeB<sub>E859A</sub></i> - <i>attB2</i>                                              | pJB908 expressing inactive ART domain of <i>sdeB</i> | (8)                  |
| pTO198                               | pSR47S:: <i>ΔlegA3</i>                                                                                                       | <i>legA3</i> deletion plasmid                        | (9)                  |

## *E. coli*

DH5 $\alpha$  *supE44 ΔlacU169(Φ80lacZDM15)*

*hsdR17 recA1 endA1 gyrA96  
thi-1 relA1*

DH5α λpir DH5α (λpir) tet::Mu recA (10)  
BL21 DE3 F<sup>+</sup> *ompT hsdSB dcm (DE3)*

### Oligonucleotides

Name Sequences (5' to 3')

---

#### *Construction of sdhA mutant*

SK1 GGCGCTAATTGCTGAAATCATTTC AATATTA AAAAAAATTAAC  
SK2 CCGGGGATGAACAATTTACCCCTG  
SK3 GATTTCAGCAATTAGCGCCATCCGCATAAAAATATTTG  
SK4 GAACTAGGGCGTAGGCGTTGACCATTA A AAG  
pSR47s\_sdhA\_F TTGTTTCATCCCCGGGCTGCAGGAAT  
pSR47s\_sdhA\_R CCTACGCCCTAGTTCTAGAGCGGCCGCC

#### *Construction of ridL mutant*

SK5 TCATTATTATTATGTGTTTCATTTTAAGCCAAAAAAC  
SK6 AGCCCGGGGGTTATTACTGAAGTCGTGAC  
SK7 CTAGA ACTAGGATACTGGTGGATTGTCG  
SK8 TGAACACATAATAATAATGACTTTGGCTCTC  
pSR47s\_ridL\_F CAGTAATAACCCCCGGGCTGCAGGAAT  
pSR47s\_ridL\_R CACCAGTATCCTAGTTCTAGAGCGGCCGCC

#### *Confirmation of recombinant plasmid*

pSR47s\_conF GGGAACAAAAGCTGGAGC  
pSR47s\_conR GTGAACGGCAGGTATATGT

#### *qRT-PCR*

Name Sequences (5' to 3')

rRNA\_F AGAGATGCATTAGTGCCTTCGGGA  
rRNA\_R ACTAAGGATAAGGGTTGCGCTCGT  
ridL\_F GTCCTCTGAAGGATAGCGAAAC  
ridL\_R GTGTAAGTTCCCGCAACAAATC  
sidE\_F GCCTAAGTACGTTGAAGGGATAG  
sidE\_R GCCTGTCAAGAGCACCTTTA  
sdeC\_F AAATCAGGAGAAGCGGTTAGG  
sdeC\_R CGTGAGAGCCGGGATAATTT  
sdeB\_F CCAGGCTTCACTCACTTGATAA  
sdeB\_R CCTCTCGATACCTACTGTGTCT  
sdeA\_F CCCACTGCACCACAAGATAA  
sdeA\_R GGTATACGGTTTGCCAGATAG  
sdhA\_F GGAAGGCAGGATTCTCCATTTA  
sdhA\_R AGCTCTGAGTTCAGGAGGTAT  
legA3\_F CTCCGCTCTTTCCAGATGAC  
legA3\_R GAGTGGGTCGAGTGGGATAA

sidJ\_F            GTTG TTCCTACCCAACCTGG  
sidJ\_R            CAGAGAGGTGTCATGAGTGC

*Mariner Tn-seq sequencing library construction*

|      |                      |       |
|------|----------------------|-------|
| Name | Sequences (5' to 3') | Index |
|------|----------------------|-------|

*First PCR*

|              |                                    |  |
|--------------|------------------------------------|--|
| Nextera 2A-R | GTCTCGTGGGCTCGGAGATGTGTATAAGAGACAG |  |
| 1st_TnR      | GTAATACGACTCACTATAGGGTCTAGAG       |  |

*Second PCR- Leftward Mariner specific Nextera Indexed primers*

|        |                                                                               |          |
|--------|-------------------------------------------------------------------------------|----------|
| mar147 | AATGATACGGCGACCACCGAGATCTACACGCAGGCGGC<br>GTTGACCGGGGACTTATCAGCCAACCTGTTA     | GCAGGCGG |
| mar148 | AATGATACGGCGACCACCGAGATCTACACAGGCAGAAC<br>GTTGACCGGGGACTTATCAGCCAACCTGTTA     | AGGCAGAA |
| mar149 | AATGATACGGCGACCACCGAGATCTACACCAGAGAGGC<br>GTTGACCGGGGACTTATCAGCCAACCTGTTA     | CAGAGAGG |
| mar150 | AATGATACGGCGACCACCGAGATCTACACCGAGGCTGC<br><br>GTTGACCGGGGACTTATCAGCCAACCTGTTA | CGAGGCTG |
| mar151 | AATGATACGGCGACCACCGAGATCTACACAAGAGGCAC<br>GTTGACCGGGGACTTATCAGCCAACCTGTTA     | AAGAGGCA |
| mar152 | AATGATACGGCGACCACCGAGATCTACACGAGGAGCCC<br>GTTGACCGGGGACTTATCAGCCAACCTGTTA     | GAGGAGCC |

*Second PCR- Rightward Mariner specific Nextera Indexed primers*

|            |                                                             |          |
|------------|-------------------------------------------------------------|----------|
| olk141     | CAAGCAGAAGACGGCATAACGAGATCCGCCTGCGTCTCGT<br>GGGCTCGGAGATGTG | GCAGGCGG |
| N703 index | CAAGCAGAAGACGGCATAACGAGATTTCTGCCTGTCTCGT<br>GGGCTCGGAGATGTG | AGGCAGAA |

*Reconditioning*

|    |                        |
|----|------------------------|
| P1 | AATGATACGGCGACCACCGA   |
| P2 | CAAGCAGAAGACGGCATAACGA |

*Sequencing*

|        |                                  |
|--------|----------------------------------|
| mar512 | CGTTGACCGGGGACTTATCAGCCAACCTGTTA |
|--------|----------------------------------|

---

## SI References

1. K. H. Berger, R. R. Isberg, Two distinct defects in intracellular growth complemented by a single genetic locus in *Legionella pneumophila*. *Mol Microbiol* **7**, 7-19 (1993).
2. K. C. Jeong, J. A. Sexton, J. P. Vogel, Spatiotemporal regulation of a *Legionella pneumophila* T4SS substrate by the metaeffector SidJ. *PLoS Pathog* **11**, e1004695 (2015).
3. A. W. Ensminger, Y. Yassin, A. Miron, R. R. Isberg, Experimental evolution of *Legionella pneumophila* in mouse macrophages leads to strains with altered determinants of environmental survival. *PLoS Pathog* **8**, e1002731 (2012).
4. J. M. Park, S. Ghosh, T. J. O'Connor, Combinatorial selection in amoebal hosts drives the evolution of the human pathogen *Legionella pneumophila*. *Nat Microbiol* **5**, 599-609 (2020).
5. J. J. Merriam, R. Mathur, R. Maxfield-Boumil, R. R. Isberg, Analysis of the *Legionella pneumophila* *fliI* gene: intracellular growth of a defined mutant defective for flagellum biosynthesis. *Infect Immun* **65**, 2497-2501 (1997).
6. J. Coers, R. E. Vance, M. F. Fontana, W. F. Dietrich, Restriction of *Legionella pneumophila* growth in macrophages requires the concerted action of cytokine and Naip5/Ipaf signalling pathways. *Cell Microbiol* **9**, 2344-2357 (2007).
7. V. M. Morales, A. Backman, M. Bagdasarian, A series of wide-host-range low-copy-number vectors that allow direct screening for recombinants. *Gene* **97**, 39-47 (1991).
8. K. M. Kotewicz *et al.*, A Single *Legionella* Effector Catalyzes a Multistep Ubiquitination Pathway to Rearrange Tubular Endoplasmic Reticulum for Replication. *Cell Host Microbe* **21**, 169-181 (2017).
9. T. J. O'Connor, D. Boyd, M. S. Dorer, R. R. Isberg, Aggravating genetic interactions allow a solution to redundancy in a bacterial pathogen. *Science* **338**, 1440-1444 (2012).
10. R. Kolter, M. Inuzuka, D. R. Helinski, Trans-complementation-dependent replication of a low molecular weight origin fragment from plasmid R6K. *Cell* **15**, 1199-1208 (1978).
